# Supplementary material for: Liver Kinase B1—A Potential Therapeutic Target in Hormone-Sensitive Breast Cancer in Older Women
Source: Cancers (Basel). 2019 Jan 28;11(2):149. doi: 10.3390/cancers11020149 (PMC6406422; doi:10.3390/cancers11020149)
Supplement: Supplementary file 1 [file cancers-11-00149-s001.pdf]

# Supplementary Materials: Liver Kinase B1—A Potential Therapeutic Target in Hormone-Sensitive Breast Cancer in Older Women

Binafsha Manzoor Syed, Andrew R Green, David A L Morgan, Ian O Ellis and Kwok-Leung Cheung

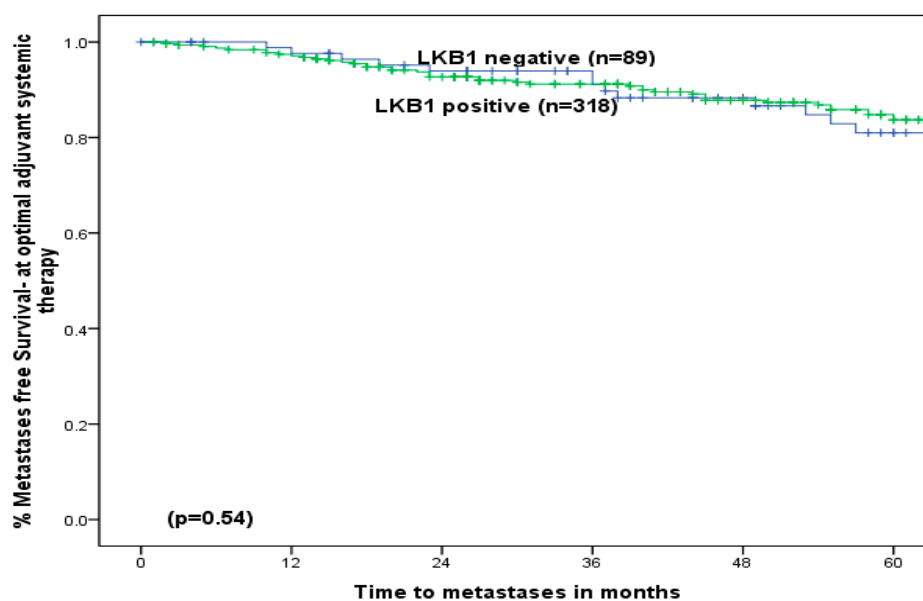

(a)

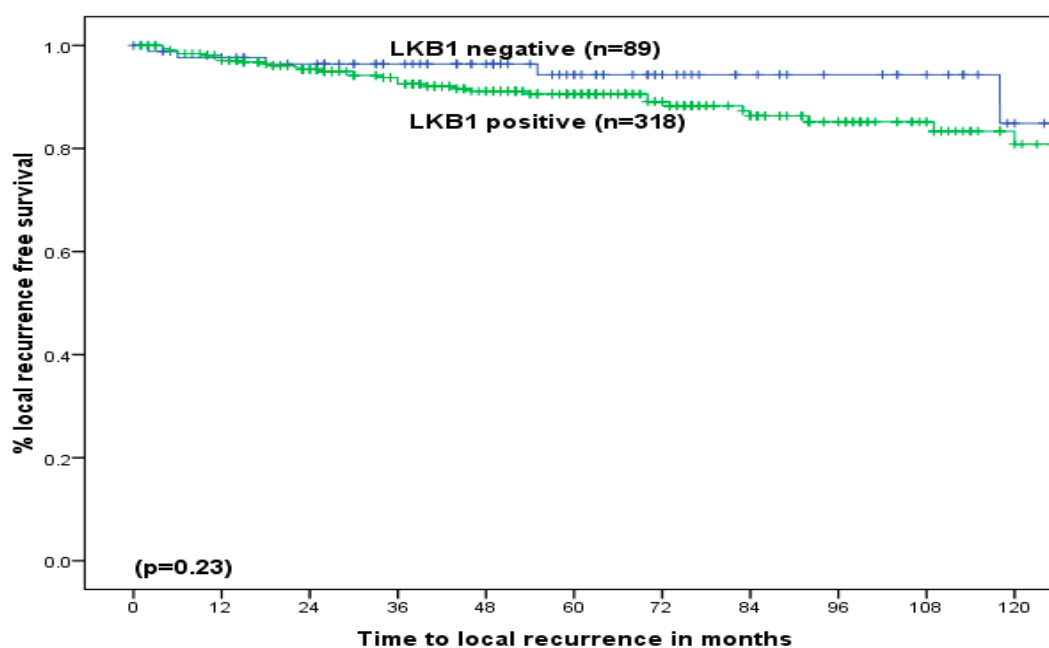

(b)

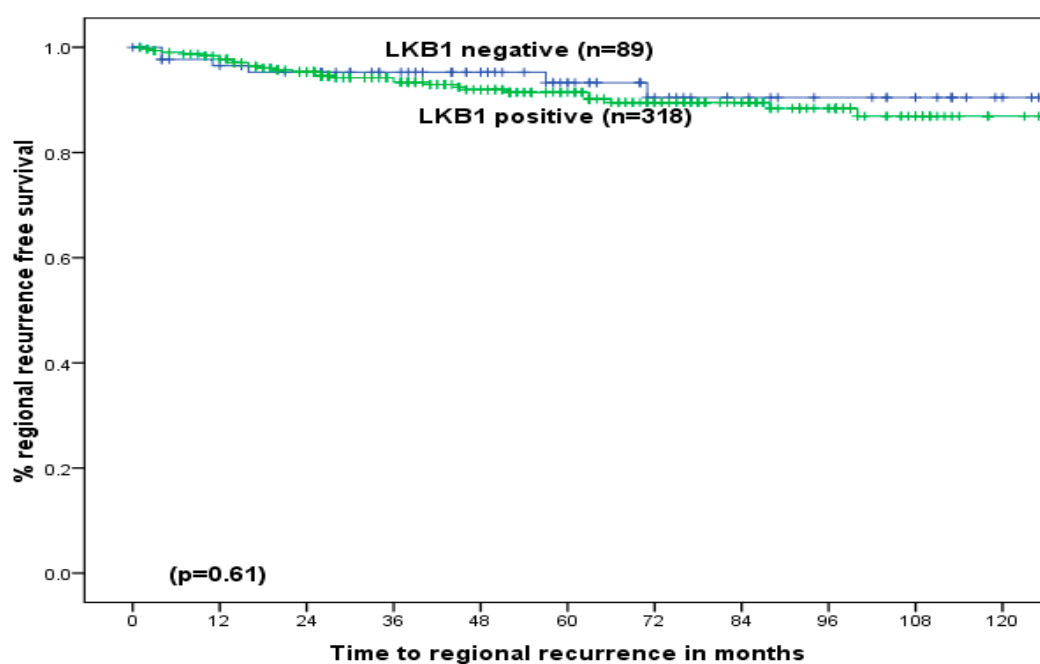

(c)

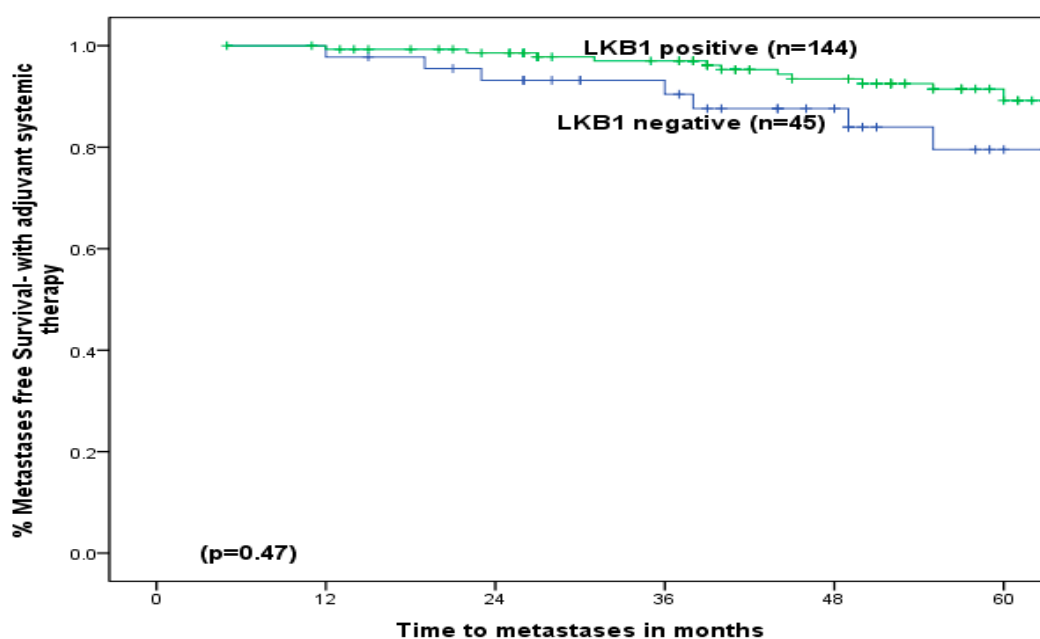

(d)

**Figure S1.** (a) Metastasis-free survival according to the expression of LKB1 in older women with early operable primary breast cancer (all patients). (b) Local recurrence-free survival according to the expression of LKB1 in older women with early operable primary breast cancer (all patients). (c) Regional recurrence free survival according to the expression of LKB1 in older women with early operable primary breast cancer (all patients). (d) Metastasis-free survival according to the expression of LKB1 in older women with early operable primary breast cancer who received adjuvant endocrine therapy.

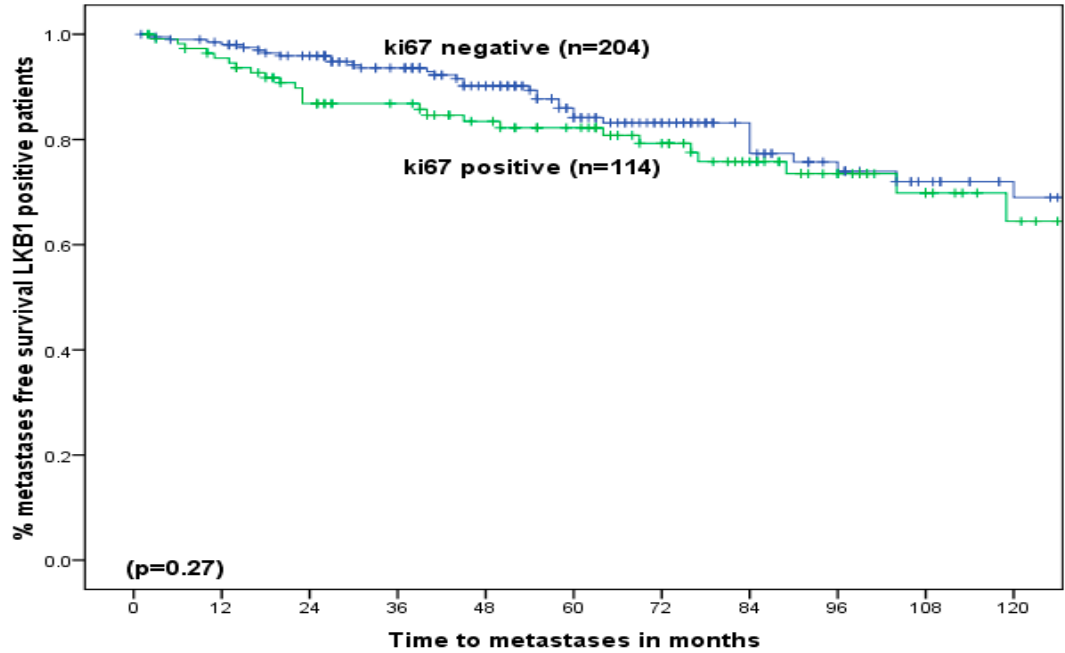

(a)

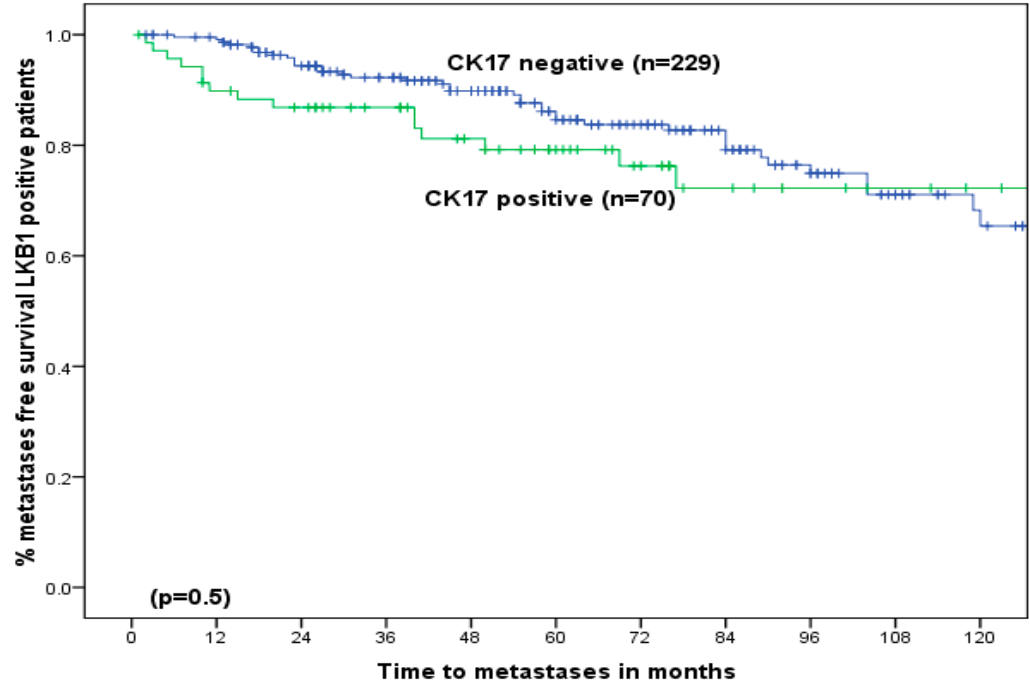

(b)

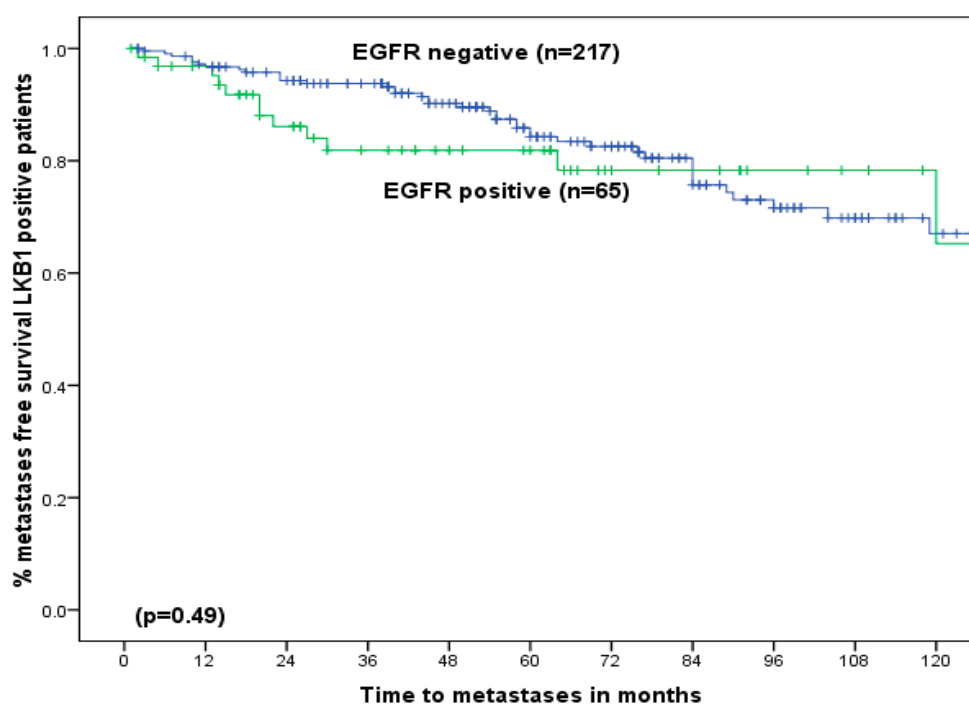

(c)

**Figure S2.** (a) Metastases free survival in LKB1 positive early operable primary breast cancer in older women: Ki67 positive versus Ki67 negative. (b) Metastasis-free survival in LKB1 positive early operable primary breast cancer in older women: CK17 positive versus CK17 negative. (c) Metastasis-free survival in LKB1 positive early operable primary breast cancer in older women: EGFR positive versus EGFR negative.

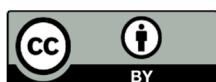

© 2019 by the authors. Submitted for possible open access publication under the terms and conditions of the Creative Commons Attribution (CC BY) license (<http://creativecommons.org/licenses/by/4.0/>).
